# Supplementary material for: A novel design to screen chlorogenic acid-producing microbial strains from the environment
Source: PubMed Central journal article supplement (PMC6170458; doi:10.1038/s41598-018-32968-0), 2018-10-03
Supplement: 41598_2018_32968_MOESM1_ESM.pdf [file 41598_2018_32968_MOESM1_ESM.pdf]

## **Title Page**

**Title:** A novel design to screen chlorogenic acid-producing microbial strains from the environment

Xiao Wang <sup>1</sup>, Lifang Qin <sup>1</sup>, Jia Zhou <sup>1</sup>, Youzhi Li <sup>1\*</sup>, Xianwei Fan <sup>1\*</sup>

<sup>1</sup> State Key Laboratory for Conservation and Utilization of Agricultural Bioresource in Subtropics, College of Life Science and Technology, Guangxi University, Nanning 530004, China

\*Correspondence and requests for materials should be addressed to F.X.W (email: fanxw@gxu.edu.cn) or L.Y.Z. (email: dyzl@gxu.edu.cn)

Tel: +86-771-3272130

Fax: +86-771-3272130

**Table S1.** Effect of culture time on the halo diameter (mm, means  $\pm$  se.) of strain on the medium with Al-free, low and high Al

| Medium  | Day             |                 |                 |                 |
|---------|-----------------|-----------------|-----------------|-----------------|
|         | 5 d             | 6 d             | 7 d             | 8 d             |
| Al-free | 1.50 $\pm$ 0.01 | 2.00 $\pm$ 0.04 | 3.73 $\pm$ 0.07 | 4.93 $\pm$ 0.03 |
| Low Al  | 3.26 $\pm$ 0.02 | 3.82 $\pm$ 0.02 | 5.02 $\pm$ 0.02 | 5.40 $\pm$ 0.01 |
| High Al | 4.22 $\pm$ 0.03 | 4.48 $\pm$ 0.01 | 5.56 $\pm$ 0.01 | 6.50 $\pm$ 0.01 |

**Table S2** Comparison of the retardation factor ( $R_f$ ) of the fermentation products of each isolated strain with that of chlorogenic acid (CGA)

|               |                 |                 |                 |                 |                 |                 |                 |                 |
|---------------|-----------------|-----------------|-----------------|-----------------|-----------------|-----------------|-----------------|-----------------|
| Strain number | CGA             | P212            | P292            | P2102           | B14             | B17             | B19             | S216            |
| $R_f$         | $0.75 \pm 0.01$ | $0.74 \pm 0.02$ | $0.73 \pm 0.01$ | $0.75 \pm 0.01$ | $0.74 \pm 0.01$ | $0.74 \pm 0.01$ | $0.77 \pm 0.03$ | $0.75 \pm 0.07$ |
| Strain number | N22             | N21             | D215            | N222            | N25             | N231            | N239            | N32             |
| $R_f$         | $0.74 \pm 0.02$ | $0.75 \pm 0.01$ | $0.75 \pm 0.01$ | $0.77 \pm 0.01$ | $0.82 \pm 0.02$ | $0.79 \pm 0.04$ | $0.82 \pm 0.03$ | $0.70 \pm 0.01$ |
| Strain number | CGA             | N24             | N220            | D230            | N31             | N23             | B111            | N224            |
| $R_f$         | $0.75 \pm 0.01$ | $0.71 \pm 0.01$ | $0.72 \pm 0.02$ | $0.70 \pm 0.03$ | $0.71 \pm 0.02$ | $0.74 \pm 0.03$ | $0.76 \pm 0.02$ | $0.74 \pm 0.04$ |

## Supplementary Figures

To check the chelating ability of other similar structural compounds with  $\text{Al}^{3+}$ , shikimic acid, quinine acid, caffeic acid, trans-cinnamic acid, p-coumaric acid and 5-O-caffeoylshikimic acid were chosen and respectively, dissolved in 15 ml tubes with 5 mL of liquid BEA medium to produce a 1.8 mM above structural compounds (shikimic acid quinine acid, caffeic acid, trans-cinnamic acid, p-coumaric acid and 5-O-caffeoylshikimic acid), then  $\text{AlCl}_3$  was added in two tubes to produce 0.9 mM  $\text{AlCl}_3$  solution. Subsequently, the mixture was then separately adjusted to pH 7.0 using 1 M NaOH solution. After 30 min incubation at room temperature, the mixture was subjected to spectral analysis in the range of 200 to 800 nm. CGA were also carried out as a control. The results showed that no absorbance appeared at 400-800 nm in the mixture solution of shikimic acid and  $\text{AlCl}_3$  (Figure S1. A), and similar results occurred in the mixture solution of other similar structural chemicals (quinine acid, caffeic acid, trans-cinnamic acid, p-coumaric acid and 5-O-caffeoylshikimic acid) and  $\text{AlCl}_3$  (Figure S1. B-F). However, a single absorption peak was observed at 570 nm after formation of the CGA- $\text{Al}^{3+}$  complex at pH 7.0 (Figure S1. G). In addition, the purple color development of mixture solution was only observed in the mixture solution of CGA and  $\text{AlCl}_3$  (Figure S1. G). Whereas, the color development appeared yellow in the mixture solution of 5-O-caffeoylshikimic acid and  $\text{AlCl}_3$  (Figure S1. F). In all, these results indicated that the proposed method is specific for CGA and confers to detect CGA-synthetic strains quickly.

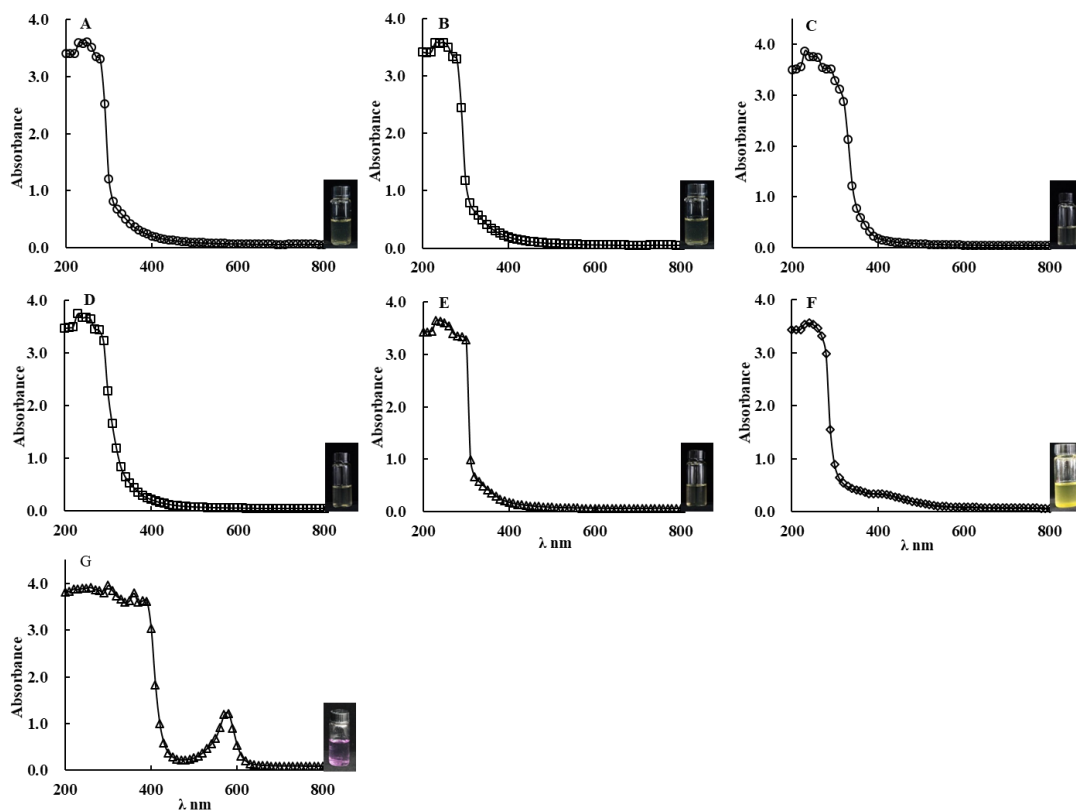

Figure S1. Comparison of the absorption spectra and color development of the complex formed between shikimic acid (A), quinine acid (B), Caffeic acid (C), trans- Cinnamic acid (D), p-coumaric acid (E), 5-O-caffeoylshikimic acid (F) and chlorogenic acid (G) and aluminum (III) in beef extract agar (BEA) liquid medium.  $[Al] = 0.9$  mM,  $[chlorogenic\ acid] = 1.8$  mM,  $[shikimic\ acid] = 1.8$  mM,  $5\text{-}O\text{-caffeoylshikimic\ acid} = 1.8$  mM,  $[quinine\ acid] = 1.8$  mM,  $[Caffeic\ acid] = 1.8$  mM,  $[trans\text{-}Cinnamic\ acid] = 1.8$  mM and  $[p\text{-}coumaric] = 1.8$  mM.

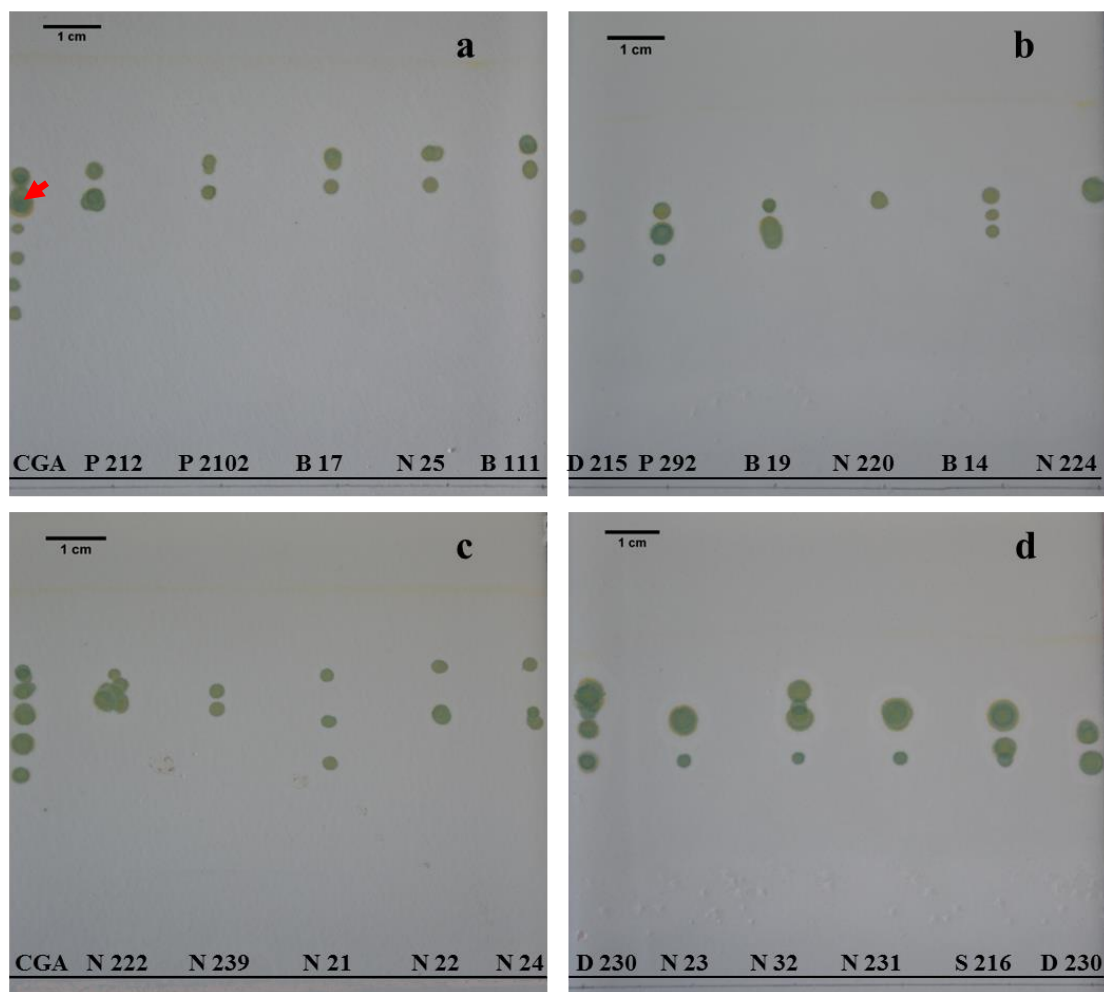

**Figure. S2** Thin Layer Chromatography of authentic chlorogenic acid (CGA) and the extracts of isolated strains. Red arrowhead indicates the pure spot of CGA standard sample.

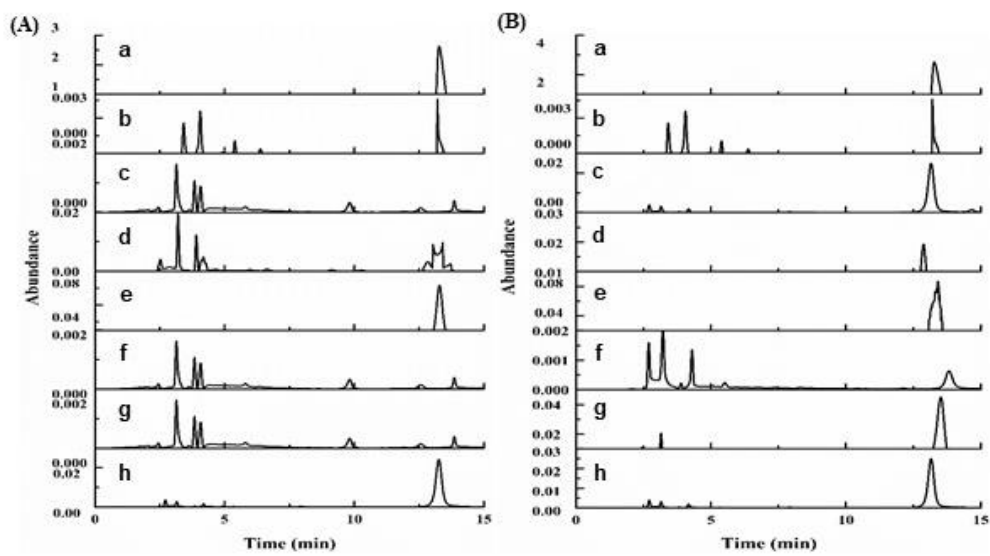

**Figure. S3** Comparative analysis of the retention times of chlorogenic acid in the extracts of different strains. A: the individual extracts of the strain samples, S216 (a), P212 (b), N22 (c), N21 (d), B19 (e), B17 (f), B14 (g); B: the individual extracts of the strains examples was mixed with 2  $\mu$ g authentic chlorogenic acid (h).

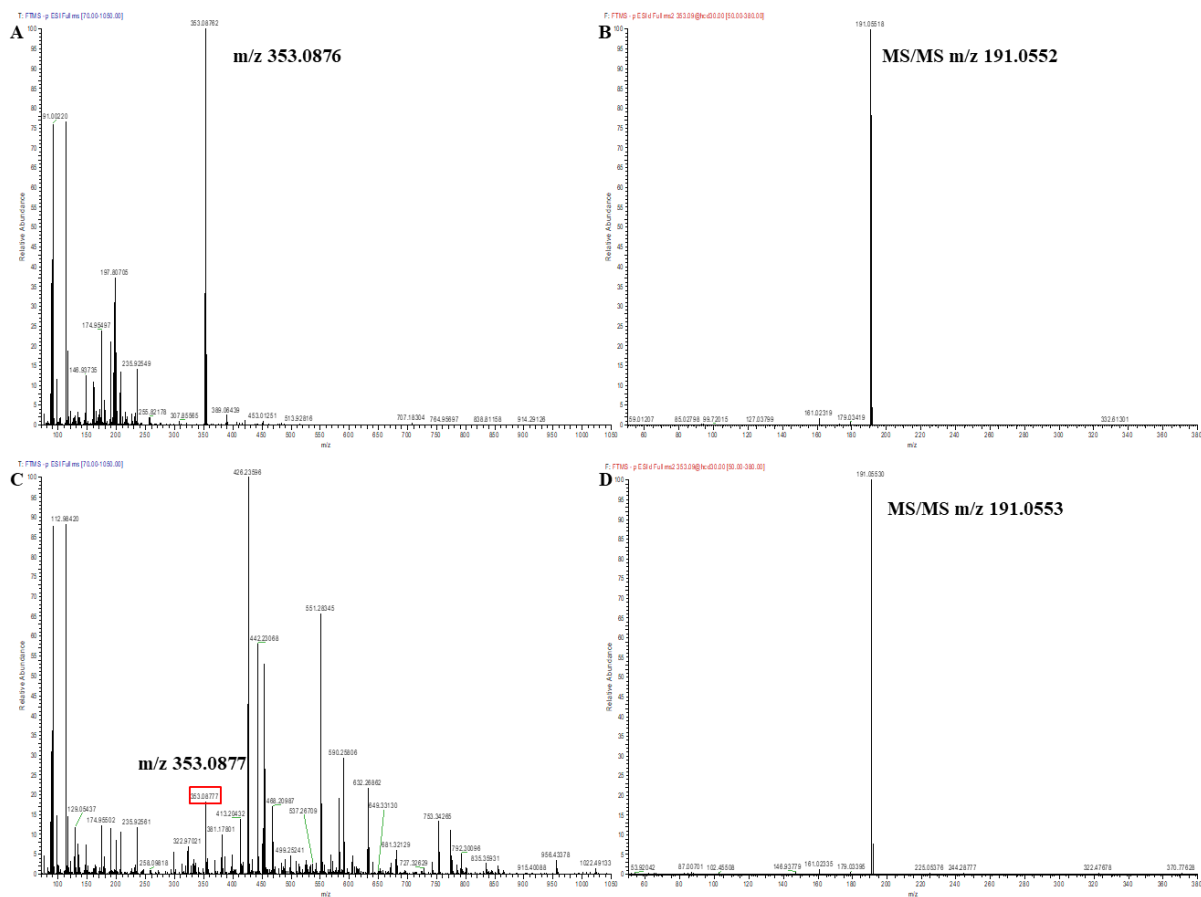

**Figure. S4-1** Mass spectrometry (MS) and MS/MS characterization of 0.2 mg L<sup>-1</sup> authentic chlorogenic acid (A, B) and those of fermentation product of strain S216 (C, D). (Thermo Q Exactive, Massachusetts, USA)



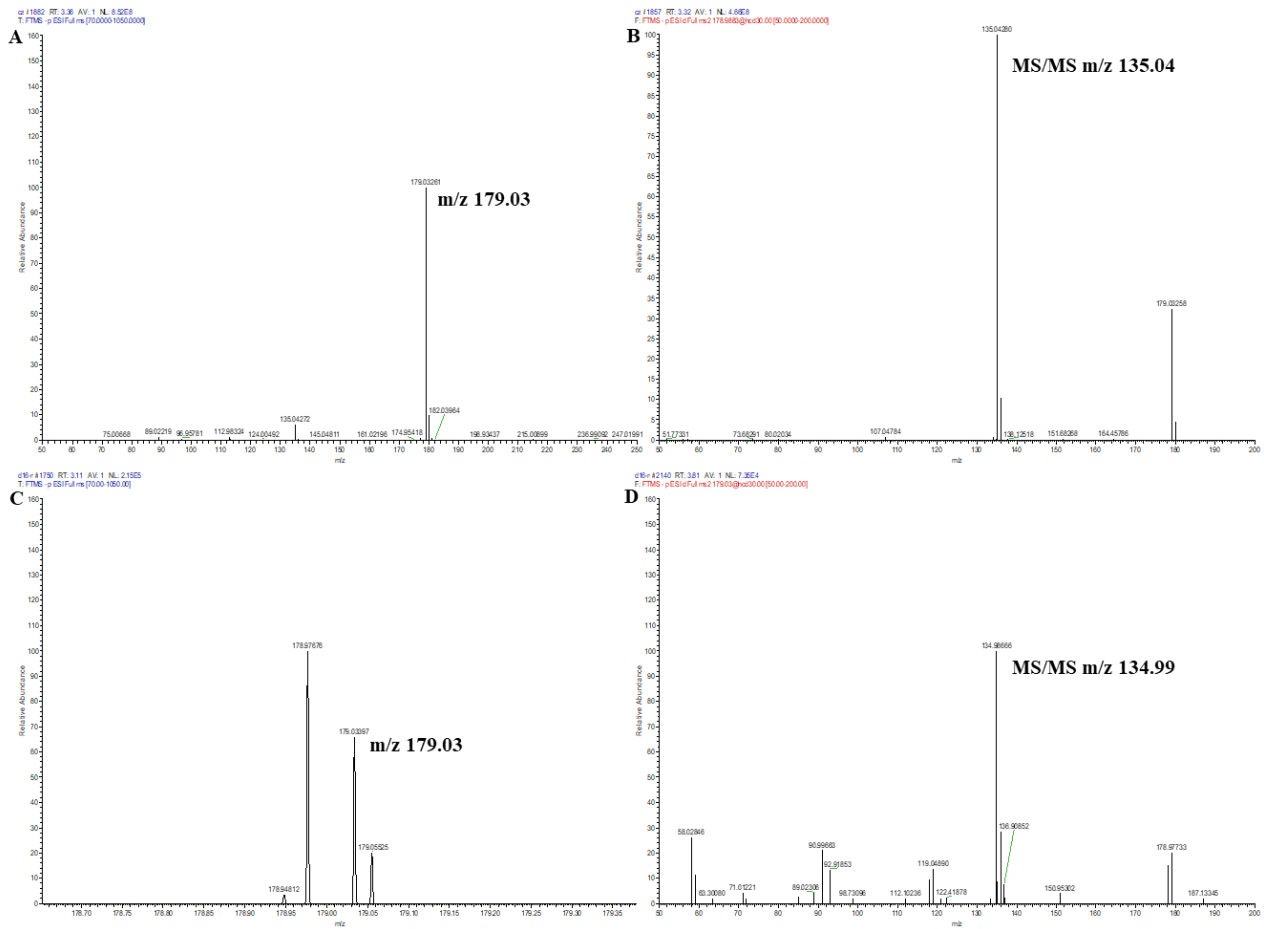

**Figure S4-2** Mass spectrometry (MS) and MS/MS characterization of  $0.2 \text{ mg L}^{-1}$  authentic Caffeic acid (A, B) and those of fermentation product of strain S216 (C, D). (Thermo Q Exactive, Massachusetts, USA)

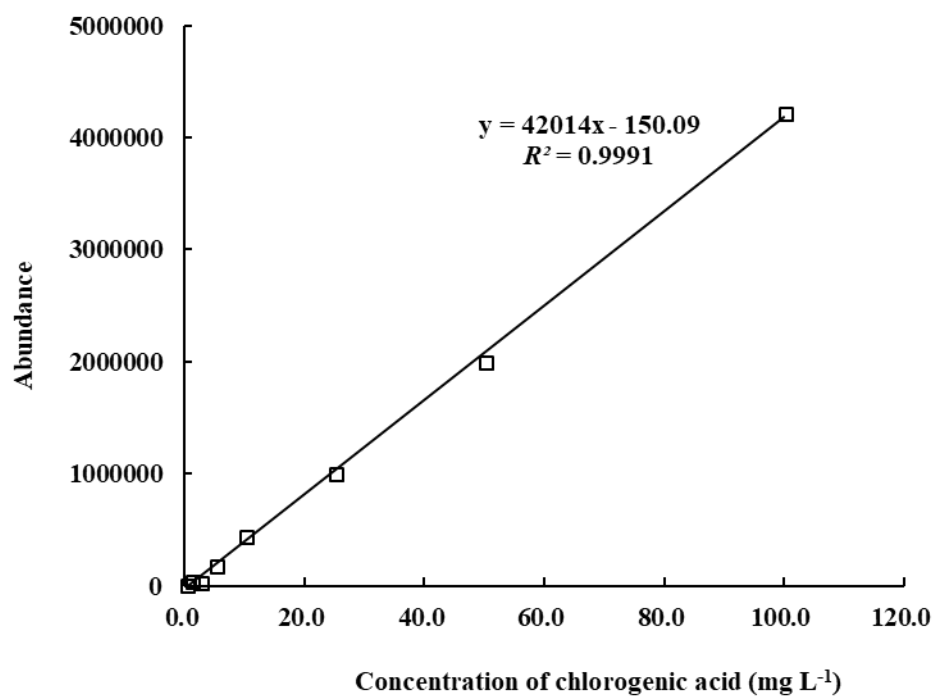

**Figure. S5** Calibration curve for UPLC-MS with chlorogenic acid standard solution of 0-100 mg L<sup>-1</sup>

## Supporting Information 1

### The sequence of the biosynthetic CGA strains

B14:

GGGGGGGACCGTCTAATAATGCAGTCGAGCGAGTCCCTTCGGGGGCTAGCGGCGGACGGGTGAGTAACACGTAGGCAA  
CCTGCCCGTAAGCTCGGGATAACATGGGGAAACTCATGCTAATACCGGATAGGGTCTTCTCTCGCATGAGGGGAGACGGA  
AAGGTGGCGAAGCTACCACTTACGGATGGGCTGCGGCGCATTAGCTAGTTGGTGGGGTAACGGCCTACCAAGGCGACG  
ATGCGTAGCCGACCTGAGAGGGTGACCGGCCACACTGGGACTGAGACACGGCCAGACTCTACGGGAGGCAGCAGTAG  
GGAATTTCCACAATGGACGAAAGTCTGATGGAGCAACGCCGCGTGAACGATGAAGGTCTTCGGATTGTAAAGTTCTGTT  
GTCAGAGACGAACAAGTACCGTTCGAACAGGGCGGTACCTTGACGGTACCTGACGAGAAAGCCACGGCTAACTACGTGCC  
AGCAGCCGCGTAATACGTAGGTGGCAAGCGTTGTCGGAATTATTGGGCGTAAAGCGCGCGCAGGCGGCTATGTAAGTC  
TGGTGTAAAGCCCGGGCTCAACCCCGTTCGCATCGGAACTGTGTAGCTTGTAGTGCAGAAGAGGAAAGCGGTATTCC  
ACGTGTAGCGGTGAAATGCGTAGAGATGTGGAGGAACACCAGTGGCGAAGGCGGCTTTCTGGTCTGTAAGTACGCTGAG  
GCGGAAAAGCGTGGGAGCAACAGGATTAGATACCCTGGTAGTCCACGCCGTAAACGATGAGTGCTAGGTGTTGGGGT  
TTCAATACCCTCAGTGCCGAGCTAACGCAATAAGCACTCCGCCTGGGAGTACGCTCGCAAGAGTGAAACTCAAAGGAA  
TTGACGGGGGCCCCGACAAGCGGTGGAGCATGTGGTTAATTCGAAGCAACGCGAAGAACCTTACCAGGTCTTGACATCC  
CGTGACCGTCTAGAGATAGGGCTTCCCTTCGGGGCAGCGGTGACAGGTGGTGCATGGTTGTCGTCAGCTCGTGTGCGTA  
GATGTGGGTTAAGTCCCGCAACGAGCGCAACCCCTTATCTTTAGTTGCCAGCATTAGTTGGGCACTCTAGAGAGACTGCC  
GTCGACAAGACGGAGGAAGGCGGGGATGACGTCAAATCATCATGCCCTTATGACCTGGGCTACACACGTGCTACAATGG  
CTGTTACAACGGGAAGCTAGCTCGCGAGAGTATGCCAATCTCTTAAAACAGTCTCAGTTCCGATTGACAGGCTGCAACTCG  
CCTGCATGAAGTCGGAATCGCTAGTAATCGCGGATCAGCATGCCGCGGTGAATACGTTCCCGGGCCTTGTACACACCGCCC  
GTCACACCACGGGAGTTTGAACACCCGAAGTCGGTGAGGTAACCGCAAGGAGCCAGCCCGCGTAAGTTGTAACCT

B17:

ATGGTTCAAATTATACCCGCTATAGTGTGAGTCGAGCGGACAGATGGGAGCTTGCTCCCTGATGTTAGCGGCGGACGGGT  
GAGTAACACGTGGGTAACCTGCCTGTAAGACTGGGATAACTCCGGGAAACCGGGGCTAATACCGGATGTTGTCTGAACC  
GCATGGTTCAGACATAAAAGGTGGCTTCGGCTACCACTTACAGATGGACCCGCGGCGCATTAGCTAGTTGGTGAGGTAAC  
GGCTACCAAGGCGACGATGCGTAGCCGACCTGAGAGGGTGATCGGCCACACTGGGACTGAGACACGGCCAGACTCCTA  
CGGGAGGCAGCAGTAGGGAATCTCCGCAATGGACGAAAGTCTGACGGAGCAACGCCGCGTGAGTGATGAAGTTTTTCGG  
ATCGTAAAGCTCTGTTGTTAGGGAAGAACAAGTGCCGTTCAAATAGGGCGGCACCTTGACGGTACCTAACCAGAAAGCCA  
CGGCTAACTACGTGCCAGCAGCCGCGTAATACGTAGGTGGCAAGCGTTGTCGGAATTATTGGGCGTAAAGGGCTCGCA  
GGCGGTTTTCTAAGTCTGATGTGAAAGCCCCGGCTCAACCGGGGAGGGTCATTGGAAACTGGGGAAGTTGAGTGCAGAA  
GAGGAGAGTGGAATTCACGTGTAGCGGTGAAATGCGTAGAGATGTGGAGGAACACCAGTGGCGAAGGCGACTCTCTGG  
TCTGTAAGTACGCTGAGGAGCGAAAGCGTGGGAGCGAACAGGATTAGATACCCTGGTAGTCCACGCCGTAACGATGA  
GTGCTAAGTGTAGGGGGTTTTCCGCCCTTAGTGCTGCAGCTAACGCATTAAGCACTCCGCTGGGAGTACGGTGCAGAA  
ACTGAAACTCAAAGGAATTGACGGGGGCCGCACAAGCGGTGGAGCATGTGGTTAATTGCAAGCAACGCGAAGAACCTT  
ACCAGTCTTGACATCCTCTGACAACTAGAGATAGGACGTCCCTTCGGGGCAGAGTGACAGGTGGTGCATGGTTGTC  
GTCAGCTCGTGTGATGATGTTGGGTTAAGTCCCGCAACGAGCGCAACCCCTTGATCTTAGTTGCCAGCATTAGTTGGGC  
ACTTAAGGTGACTGCCGTTGACAAACCGGAGGAAGGTGGGGATGACGTCAAATCATCATGCCCTTATGACCTGGGCTA  
CACACGTGCTACAATGGACAGAACAAGGGCAGCGAAACCGGAGGTTAAGCCAATCCACAAATCTGTTCTCAGTTCCG  
ATCGCAGTCTGCAACTCGACTGCGTGAAGCTGGAATCGCTAGTAATCGCGGATCAGCATGCCGCGGTGAATACGTTCCCG  
GGCCTGTACACACCGCCGTCACACCACGAGAGTTTGTAAACCCGAAGTCGGTGAGGTAACCTTTATGGAGACAGCCG  
CCGTACAAGTGATAAGGCTGGG

B111:

GGCATGGGGATACTCTAGAGTGAGATCGTGAGCTCGAAGATGGGAGCTTGGTCCCTGAAGTTAGCGGGGACGGGTGAGT  
AACACGTGGGTAACCTGCCTGTAAGACTGGGATAACTCCGGGAAACCGGGGCTAATACCGGATGGTTGTTGAACCGCAT  
GGTTCAAACATAAAAAGGTGGCTTCGGCTACCCTTACAGATGGACCCGCGGCATTAGCTAGTTGGTGAGGTAACGGCT  
CACCAAGGCAACGATGCGTAGCCGACCTGAGAGGGTGATCGGCCACACTGGGACTGAGACACGGCCAGACTCCTACGG  
GAGGCAGCAGTAGGGAATCTTCGCAATGGACGAAAGTCTGACGGAGCAACGCCGCTGAGTGATGAAGGTTTTCGGATC  
GTAAAGCTCTGTTGTTAGGGAAGAACAAGTACCGTTTCGAATAGGGCGGTACCTTGACGGTACCTAACAGAAAAGCCACGG  
CTAACTACGTGCCAGCAGCCGGTAATACGTAGGTGGCAAGCGTTGTCCGGAATTATTGGGCGTAAAGGGCTCGCAGGC  
GGTTTCTTAAGTCTGATGTGAAAGCCCCGGCTCAACCGGGGAGGGTCATTGGAAACTGGGGAACCTGAGTGCAGAAGAG  
GAGAGTGAATTCCACGTGTAGCGGTGAAATGCGTAGAGATGTGGAGGAACACCAGTGGCGAAGGGCGACTCTCTGGTCTG  
TAACTGACGCTGAGGAGCGAAAGCGTGGGAGCGAACAGGATTAGATACCCTGGTAGTCCACGCCGTAACGATGAGTG  
CTAAGTGTAGGGGGTTTCCGCCCTTAGTGTGCAGCTAACGCATTAAGCACTCCGCTGGGGAGTACGGTGCAGAACT  
GAAACTCAAAGGAATTGACGGGGCCCGCACAAAGCGGTGGAGCATGTGGTTAATTCGAAGCAACCGGAAGAACCCTTACC  
AGGTCTTGACATCCTCTGACAATCTAGAGATAGGACGTCCCTTCGGGGCAGAGTGACAGGTGGTGCATGGTTGTCTGTC  
AGCTCGTGTGAGATGTTGGGTTAAGTCCCGCAACGAGCGCAACCCCTTGATCTTAGTTGCCAGCATTAGTTGGGCACT  
CTAAGGTGACTGCCGGTGACAAACCGGAGGAAGGTGGGGATGACGTCAAATCATCATGCCCTTATGACCTGGGCTACAC  
ACGTGTACAATGGACAGAACAAAGGGCAGCGAAACCGGAGGTTAAGCCAATCCCACAAATCTGTTCTCAGTTCCGGATC  
GCAGTCTGCAACTCGACTGCGTGAAGTGAATCGCTAGTAATCGCGGATCAGCATGCCCGGTGAATACGTTCCCGGC  
CTTGACACACCGCCGTCACACCAGAGAGTTCCACACCGGAAGTCGGGGAGCTAACATATGAGGACACAGTATAACG  
TAGAGTGTACCCCC

B19:

GGGCAAGCGACCCGCTAGAAATGCAGTCGAGCGACTTGACGGAAGCTTGCTTCCGTTCAAGTTAGCGGGGACGGGTGA  
GTAACACGTGGGTAACCTGCCTGTAAGACTGGGATAACTCCGGGAAACCGGGGCTAATACCGGATATTCTTTTTCTTCGCA  
TGAAGAAGAATGAAAGGCGGCTTTTAGTGTGCTTACAGATGGACCCGCGGCATTAGCTAGTTGGTGAGGTAACGG  
CTCACCAAGGCAACGATGCGTAGCCGACCTGAGAGGGTGATCGGCCACACTGGGACTGAGACACGGCCAGACTCCTACG  
GGAGGCAGCAGTAGGGAATCTTCGCAATGGACGAAAGTCTGACGGAGCAACGCCGCTGAGTGAAGAAGTTTTCGGA  
TCGTAAGCTCTGTTGTCAGGGAAGAACAAGTACGGAAGTAACTGTCCGTACCTTGACGGTACCTGACCAGAAAGCCACG  
GCTAACTACGTGCCAGCAGCCGGTAATACGTAGGTGGCAAGCGTTGTCCGGAATTATTGGGCGTAAAGCGCGCGCAGG  
CGGCTTCTAAGTCTGATGTGAAAGCCACGGCTCAACCGTGGAGGGTCATTGAAACTGGGAGGCTTGTAGTGCAGAAGA  
GGAGAGCGGAATTCCACGTGTAGCGGTGAAATGCGTAGAGATGTGGAGGAACACCAGTGGCGAAGGGGCTCTCTGGTCT  
GTAAGTGTGGAGGGTTTCGCCCTTACGTGCTGCAGCTAACGCATTAAGCACTCCGCTGGGGAGTACGGCCGCAAGGC  
TGAAACTCAAAGGAATTGACGGGGCCCGCACAAAGCGGTGGAGCATGTGGTTAATTCGAAGCAACCGGAAGAACCCTTAC  
CAGGTCTTGACATCCCGCTGACCGTCTGGAGACAGGCCTTCCCTTCGGGGACAGCGGTGACAGGTGGTGCATGGTTGTC  
GTCAGCTCGTGTGAGATGTTGGGTTAAGTCCCGCAACGAGCGCAACCCCTTGATCTTAGTTGCCAGCATTAGTTGGGC  
ACTTAAGGTGACTGCCGGTGACAAACCGGAGGAAGGTGGGGATGACGTCAAATCATCATGCCCTTATGACCTGGGCTA  
CACACGTGCTACAATGGATGGTACAAAGGGCTGCAAGACCGCAAGGTTTAGCCAATCCATAAAACCATTCTCAGTTCCG  
ATTGCAGGCTGCAACTCGCTGCATGAAGCCGGAATCGCTAGTAATCGCGGATCAGCATGCCCGGTGAATACGTTCCCG  
GGCCTGTACACACCGCCGTCACACCAGCAGAGTTTGAACACCCGAAGTCGGTGGGGTCAACCTGACGCGACCCAG  
CCGACCTATAGAGGTACCCAGTG

N21:

GGACGTAGGGGATGCCTACGCATGCAAGTCGAACGAGCCCTTCGGGGTTAGTGGCGCACGGGTGCGTAACCGTGGG  
AATCTGCCCTTTGGTTCGGAATAACAGCTGGAACCGGCTGCTAATACCGGATGATGACGAAAGTCCAAAGATTTATCGCC  
AGAGGATGAGCCCGGTTGGATTAGGTAGTTGGTGGGGTAAAGGCCTACCAAGCCGACGATCCATAGCTGGTCTGAGAGG

ATGATCAGCCACACTGGGACTGAGACACGGCCAGACTCCTACGGGAGGCAGCAGTGGGGAATATTGGACAATGGGCGC  
AAGCCTGATCCAGCAATGCCGCGTGAGTGATGAAGGCCCTAGGGTTGTAAAGCTCTTTACCCGGGAAGATAATGACTGT  
ACCGGGAGAATAAGCCCCGGCTAACTCCGTGCCAGCAGCCGCGTAATACGGAGGGGGCTAGCGTTGTTCCGAATTACTG  
GGCGTAAAGCGCACGTAGGCGGCTTTGTAAGTCAGAGGTGAAAGCCTGGAGCTCAACTCCAGAACTGCCTTTGAGACTGC  
ATCGCTTGAATCCAGGAGAGGTCAGTGAATTCCGAGTGTAGAGGTGAAATTCGTAGATATTCCGAAGAACCAGTGGC  
GAAGGCGGCTGACTGGACTGGTATTGACGCTGAGGTGCGAAAGCGTGGGGAGCAAACAGGATTAGATACCCTGGTAGTCC  
ACGCCGTAAACGATGATAACTAGCTGTCCGGGCACTTGGTGTCTGGGTGGCGCAGCTAACGCATTAAGTTATCCGCTGGG  
GAGTACGGCCGAAGGTTAAAACCTCAAAGGAATTGACGGGGCCGTGACACAAGCGGTGGAGCATGTGGTTTAAATTCGAAGC  
AACCGCGCAGAACCTTACCAGCGTTTGACATGTCCGGACGACTTCCAGAGATGGATTTCTTCCCTTCGGGGACTGGAACACA  
GGTGTGCATGGCTGTCTCAGCTCGTGTCTGAGATGTGGGTTAAGTCCCGCAACGAGCGCAACCCTCGCCTTAGTGA  
CCATCATTTGGTTGGGTAAGTCTAAAGGAACCGCCGGTGATAAGCCGGAGGAAGGTGGGGATGACGTCAAGTCTCATGGC  
CCTTACGCGCTGGGCTACACAGTGTACAATGGCAACTACAGTGGGACGCGACCCTGCGAGGGCGAGCTAATCCCCAAA  
AGTTGTCTCAGTTCGGATTGTTCTCTGCAACTCGAGAGCATGAAGGCGGAATCGCTAGTAATCGCGGATCAGCATGCCGCG  
GTGAATACGTTCCAGGCCTGTACACACCGCCCGTACACCATGGGAGTTGGATTACCCGAAGGCGTTGCGCCAACCCG  
TAAGGAAGCAGGCGACCACAGTGTACCCCG

N22:

GGGGCATGGCGGCAGCTACCATGCAGTCGAGCGGCAGCGGAAGTAGCTTGCTACTTTGCCGGCGAGCGAGCGGACGGGT  
GAGTAATGTCTGGGAAACTGCTGATGGAGGGGGATAACTACTGGAAACGGTAGCTAATACCGCATAACGTCGCAAGACC  
AAAGAGGGGGACCTTCGGGCTCTTGCCATCAGATGTGCCAGATGGGATTAGCTAGTAGGTGGGGTAATGGCTCACCTA  
GGCGACGATCCCTAGCTGGTCTGAGAGGATGACCAGCCACACTGGAAGTGAACACGGTCCAGACTCCTACGGGAGGCAG  
CAGTGGGGAATATTGCACAATGGGCGCAAGCCTGATGCAGCCATGCCGCGTGTATGAAGAAGGCCTTCGGGTTGTAAAGT  
ACTTTCAGCGGGAGGAAGGTGTTGAGGTTAATAACCTCAGCAATTGACGTTACCCGCAGAAGAAGCACCGGCTAACTCC  
GTGCCAGCAGCCGCGTAATACGGAGGGTGAAGCGTTAATCGGAATTACTGGGCGTAAAGCGCACGAGGCGGTCTGTCT  
AAGTCGGATGTGAAATCCCCGGGCTAACCTGGGAACTGCATTGAAACTGGCAGGCTAGAGTCTTGTAGAGGGGGTAG  
AATCCAGGTGTAGCGGTGAAATGCGTAGAGATCTGGAGGAATACCGGTGGCGAAGGCGGCCCCCTGGACAAAGACTGA  
CGCTCAGGTGCGAAAAGCGTGGGAGCAAACAGGATTAGATACCCTGGTAGTCCACGCCGTAAACGATGTGCACTGGAGG  
TTGTGCCCTTGAGGCGTGGCTTCCGGAGCTAACCGGTTAAGTCGACCGCTGGGGAGTACGGCCGAAGGTTAAAACCTCA  
AATGAATTGACGGGGCCCGCACAAGCGGTGGAGCATGTGGTTAATTCGATGCAACCGGAAGAACCTTACTACTCTTG  
ACATCCAGAGAACTTAGCAGAGATGCTTTGGTGCCTTCGGGAACTCTGAGACAGGTGCTGCATGGCTGTCTCAGCTCGT  
TTGTGAAATGTTGGGTTAAGTCCCGCAACGAGCGCAACCCTTATCCTTTGTTGCCAGCGGTTCCGGCCGGAACTCAAAGGA  
GACTGCCAGTGATAAACTGGAGGAAGGTGGGATGACGTCAAGTCATCATGGCCCTTACGAGTAGGGCTACACACGTGCT  
ACAATGGCGCATACAAAGAGAAGCGACCTCGCGAGAGCAAGCGGACCTCATAAAGTGCCTGAGTCCGGATTGGAGTCT  
GCAACTCGACTCCATGAAGTCGGAATCGCTAGTAATCGTAGATCAGAATGCTACGTTGAATACGTTCCCGGCCTGTACA  
CACCGCCCGTCACATCCATGGGCAGTGGGTTGCAAAGAAGTAGGTAGCTTAACCTTCGGGAGGGCGCTACCTCTTGAA  
ATCCCCC

N23:

GGGTTAGGGATACTATAGAGTGAGATCGTGTCTCGATATCTCGTGGCGTGGCTCCCTAGAGTGTAGCGGGGACGGG  
AGAGTAACACGTAGGCAACCTGCCCCGTAAGACTGGGATAACTACCGGAAACGGTAGCTAATACCGGATACGCAAGTTTCT  
CGCATGAGGGGCTTGGGAAAGGCGGAGCAATCTGTCACTTACGGATGGGCTGCGGGCGCATTAGCTAGTAGGTGGGGTAA  
CGGCCTACCTAGGCGACGATGCGTAGCCGACCTGAGAGGGTGAACGGCCACACTGGGACTGAGACACGGCCAGACTCCT  
ACGGGAGGCAGCAGTAGGGAATCTCCGCAATGACGAAAGTCTGACGGAGCAACGCCGCTGAGTGATGAAGGTTTTCG  
GATCGTAAAGCTCTGTTGCCAGGGAAGAACGTCCTATAGAGTAACTGCTCTCAGAGTGACGGTACCTGAGAAGAAAGCCC  
CGGCTAACTACGTGCCAGCAGCCGCGTAATACGTAGGGGGCGAGCGTTGTCGGAATTATTGGGCGTAAAGCGCGCGCA

GGCGGCTGTTAAGTCTGGTGTTAATCCTGGGGCTCAACCCCGGGTGCCTGAAACTGGACAGCTTGAGTGCAGAAG  
AGGAGAGTGAATCCACGTGTAGCGGTGAAATGCGTAGAGATGTGGAGGAACACCAGTGGCGAAGGCGACTCTCTGGG  
CTGTAAGTACGCTGAGGCGCGAAAGCGTGGGGAGCAAACAGGATTAGATACCCTGGTAGTCCACGCCGTAACGATGAA  
TGCTAGGTGTTAGGGGTTTCGATACCCTTGGTGCCGAAGTTAACACATTAAGCATTCCGCCTGGGGAGTACGGCCGAAGG  
CTGAAACTCAAAGGAATTGACGGGGACCCGCACAAGCAGTGGAGTATGTGGTTTAATTCGAAGCAACGCGAAGAACCTTA  
CCAGGTCTTGACATCCCCCTGACCGGTTTCAGAGATGTTCTTTCCTTCGGGACAGGGGAGACAGGTGGTGCATGGTTGTCG  
TCAGCTCGTGTGAGATGTTGGGTTAAGTCCCACAAGCAGCGCAACCCCTGACTTTAGTTGCCAGCAGGTGAGGCTGGG  
CACTCTAGAGTACTGCCGGTGACAAACCGGAGGAAGGTGGGGATGACGTCAAATCATCATGCCCTTATGACCTGGGCT  
ACACACGTAATAATGGCCGGTACAACGGGAAGCGAAGGAGCGATCTGGAGCGAATCCTTGAAAGCCGGTCTCAGTTCCG  
GATTGCAGGCTGCAACTCGCTGCATGAAGTCGGAATTGCTAGTAATCGCGGATCAGCATGCCGCGGTGAATACGTTCCCG  
GGTCTGTACACCGCCGTCACAGCAACAGGGTATCCAACGAGTGAAGCCGGTCTCTATATGTGTTGACACAATATCCC  
TAGAGATGTATGCC

P212:

TCCGTAGGTGAACCTGCGGAAGGATCATTACAGAATTTTGAAGATTGTGCTTAACTGCACCTTTCTTATCTACACACGTGTT  
TTTGTATTATTCTTAAACTTGTCTTGGCAGTGGCTGCTTAATTGCTCTGCTGCCAGAGGATAAACTCAACCTAAATTTTTTA  
TTTTAACTAGTCAACTGATTATATTTATTAATAGTCAAACTTTCAACAACGGATCTCTTGGTTCTCGCATCGATGAAGAA  
CGCAGCGAAATGCGATAAGTAATATGAATTGCAGATATTCGTGAATCATCGAATCTTTGAACGCACATTGCGCCCTCTGGT  
ATTCGGGAGGGCATGCTGTTTGTAGCGTCAATTCTCCCTCAAACCCCGGGTTTGGTGATGAGCAATACGCCAGGTTTGTCT  
GAAAGTTAGGAGGATATTTATAACAATGTATTAGGTCTAACCACTCCATTGTGCTTAATAAAAGCTCCAATCTATATTTCC  
AACTTCGACCTCAAATCAGGTAGGATTACCCGCTGAACCTAAGCATATCAATAAGCGGAGGAA

N224:

GGGCAAGGGTATACTATAGAGTGAGATCGTGCTCTCGATGTGTCGTAACAGGGTCCCCCTAGAGTGTGATCGAGGGGGGA  
GTAACACGTGGGTAACTGCCTGTAAAAGTGGGATAACTCCGGGAAACCGGAGCTAATACCGGATAGTTCCCTGAACCGC  
ATGGTTCAAGGATGAAAGACGGTTCGGCTGTCACTTACAGATGGACCCGCGGCGCATTAGCTAGTTGGTGAGGTAACGG  
CTCACCAAGGGCAGCATGCGTAGCCGACCTGAGAGGGTGATCGGCCACACTGGGACTGAGACACGGCCAGACTCCTACG  
GGAGGCAGCAGTAGGAATCTCCGCAATGGACGAAAGTCTGACGGAGCAACCGCGGTGAGTGATGAAGTTTTCCGGAT  
CGTAAAGCTCTGTTGTTAGGGAAGAACAAGTGAAGAGTAACTGCTTGACCTTGACGGTACCTAACAGAAAAGCCACGG  
CTAACTACGTGCCAGCAGCCGGTAATACGTAGGTGGCAAGCGTTGTCGGGAATTATTGGGCGTAAAGGGCTCGCAGGC  
GGTTTCTTAAGTCTGATGTGAAAGCCCCGGTCAACCGGGGAGGGTCAATTGGAACTGGGAACTTGAGTGCAGAAGAG  
GAGAGTGAATCCACGTGTAGCGGTGAAATGCGTAGAGATGTGGAGGAACACCAGTGGCGAAGGCGACTCTCTGGTCTG  
TAACTGACGCTGAGGAGCGAAAGCGTGGGGAGCGAACAGGATTAGATACCCTGGTAGTCCACGCCGTAACGATGAGTG  
CTAAGTGTAGGGGGTTTCCGCCCTTAGTGTGACGTAACGCATTAAGCACTCCGCCTGGGGAGTACGGTCCGAAGACT  
GAAACTCAAAGGAATTGACGGGGGCCGCACAAGCGGTGGAGCATGTGGTTTAATTCGAAGCAACGCGAAGAACCTTACC  
AGGTCTTGACATCCTCTGACAACCTAGAGATAGGGCTTCCCTTCGGGGACAGAGTGACAGGTGGTGCATGGTTGTCTGTC  
AGCTCGTGTGAGATGTTGGGTTAAGTCCCACAAGCAGCGCAACCCCTTGATCTTAGTTGCCAGCATTCAGTTGGGCACT  
CTAAGTGACTGCCGGTGACAAACCGGAGGAAGGTGGGGATGACGTCAAATCATCATGCCCTTATGACCTGGGCTACAC  
ACGTGCTACAATGACAGAAACAAGGGCTGCGAGACCGCAAGGTTTAGCCAATCCACAAAATCTGTTCTCAGTTCCGGATC  
GCAGTCTGCAACTCGACTGCGTGAAGCTGGAATCGCTAGTAATCGCGGATCAGCATGCCGCGGTGAATACGTTCCCGGGC  
GTTGTACACACCGCCGTCCTCAACACGGTAACCCAGAGTTTGTATCGCGGCTCTCTATATGTGACACAGGTATACCC  
AGAGAGTACTGCG

P292:

TTCTCCGCTTATTGATATGCTTAAGTTCAGCGGGTAATCCTACCTGATTTGAGGTGCAAGTTTGAATATAGATTGGAGCT  
TTTATTAAGCACAATGGAGTGGTTAGACCTAATACATTGTTATAAATACTCCTCCTAACTTTCAAGCAAACCTGGCGTATTG

CTCATCACAAACCCGGGGTTTGAGGGAGAAATGACGCTCAAACAGGCATGCCCTCCGGAATACCAGAGGGCGCAATGT  
GCGTTCAAAGATTCGATGATTCACGAATATCTGCAATTCATATTACTTATCGCATTTCGCTGCGTTCTTCATCGATGCGAGA  
ACCAAGAGATCCGTTGTTGAAAAGTTTTGACTATTAATAAATAATAATCAGTTGACTAGTTAAAATAAAAAATTTAGGTTGA  
GTTTATCCTCTGGCAGCAGAGCAATTAAGCAGCCACTGCCAAAGCAAGTTTTAAGAATAAAACAAAAACACGTGTGTAGA  
TAAGAAAAGTGCAGTTAAGCACAATTCTCAAAATTTCTGTAATGATCCTTCCGCAGGTTACCTACGGAAG

D215:

TTTCCTCCGGGCTTTGATATGCTTAAGTTCAGCGGGTATTCTACCTGATCCGAGGTCAACCTGTAAAGAATTTGGGGGT  
TAACGCAAGAGTCCCTCCGGATCCCAGTGCAGACGTTAGTTACTACGCAAAGGAGGCTCCGGGAGGGTCCGCCACTAC  
CTTTAAGGGCCACGTCCGCCGTGGGGCCCCAAAACCAAGCGGTGCTTGAGGGTTGAAATGACGCTCGAACAGGCATGCT  
CGCCAGAATGCTGGCGAGCGCAATGTGCGTTCAAAGATTCGATGATTCACTGAATTCTGCAATTCACATTACTTATCGCAT  
TTGCTGCGTTCTTCATCGATGCCAGAACAAGAGATCCGTTGTTAAAAGTTTAATTATTGCTTGTGCCACTCAGAAGAG  
ACGTCGTGTAATAGAGTTTGGTTTCTCCGGCGGGCGCCCCGTCCCCGTGGTGGGGCCGGCGCCGGGAGGGGAGGCC  
GCGAGAGGCTTCCCTGCCCGCCAAGCAACGGTTAGGTACGTTACAAAAGGTTATAGAGCGGTAACCTAGTAATGATC  
CCTCCGCAGGTACCCCTTACGGAA

P2102:

TTCTCCGCTTATTGATATGCTTAAGTTCAGCGGGTAATCCTACCTGATTTGAGGTCGAAGTTGAAATATAGATTGGAGCT  
TTTATTAAGCACAATGGAGTGGTTAGACCTAATAACATTGTTATAAATACTCCTCTAACTTTCAAGCAAACCTGGCGTATTG  
CTCATCACAAACCCGGGGTTTGAGGGAGAAATGACGCTCAAACAGGCATGCCCTCCGGAATACCAGAGGGCGCAATGT  
GCGTTCAAAGATTCGATGATTCACGAATATCTGCAATTCATATTACTTATCGCATTTCGCTGCGTTCTTCATCGATGCGAGA  
ACCAAGAGATCCGTTGTTGAAAAGTTTTGACTATTAATAAATAATAATCAGTTGACTAGTTAAAATAAAAAATTTAGGTTGA  
GTTTATCCTCTGGCAGCAGAGCAATTAAGCAGCCACTGCCAAAGCAAGTTTTAAGAATAAAACAAAAACACGTGTGTAGA  
TAAGAAAAGTGCAGTTAAGCACAATTCTCAAAATTTCTGTAATGATCCTTCCGCAGGTTACCTACGGAAG

S216:

TTCCGTAGGTGAACCTGCGGAGGGATCATTACTGAGTTACCGCTCTATAACCCTTTGTGAACGTACCTAACCGTTGCTTCG  
GCGGGCAGGGGAAGCCTCTCGCGGCCTCCCCTCCCGCGCCGCCCCACCACGGGGACGGGGCGCCCGCCGGAGGAA  
ACCAAACCTCTATTTACACGACGTCTCTTCTGAGTGGCACAAGCAAATAATTAACCTTTTAACAACGGATCTCTTGGTTCT  
GGCATCGATGAAGAACGCAGCGAAATGCGATAAGTAATGTGAATTGCAGAATTCAGTGAATCATCGAATCTTTGAACGCA  
CATTGCGCTCGCCAGCATTCTGGCGAGCATGCCTGTTGAGCGTCAATTTCAACCTCAAGCACCGCTTGGTTTTGGGGCCCC  
ACGGCCGACGTGGGCCCTTAAAGGTAGTGGCGACCCTCCCGAGCCTCCTTTGCGTAGTAACCTAACGTCTCGCACTGGGA  
TCCGGAGGGACTTTGCCGTTAAACCCCAAAATCTTTACAGGTTGACCTCGGATCAGGTAGGAATACCCGCTGAACTTAA  
GCATATCAAAGCCGGGAGGA

261:

GGCCGAGGCGACACCATAGCGTGCAGTGCCTCGATGAATCCCTTCGGGGTGGATTAGTGGCGAACGGGTGAGTAACACG  
TGGGCAATCTGCCCTTCACTCTGGGACAAGCCCTGGAACGGGGTCTAATACCGGATACGACCTTCGAGCGCATGCTTGAA  
GGTGGAAAAGTCCGGCGGTGAAGGATGAGCCCGCGCCTATCAGCTTGTGGTGGGGTGATGGCCTACCAAGCGCAGCAGC  
GGGTAGCCGGCCTGAGAGGGCGACCGCCACACTGGGACTGAGACACGGCCAGACTCCTACGGGAGGCAGCAGTGGGG  
AATATTGCACAATGGGCGAAAGCCTGATGCAGCGACCCGCTGAGGGATGACGGCCTTCGGGTGTAAACCTCTTTCAG  
CAGGGAAGAAGCGAAAGTGACGGTACCTGCAGAAGAAGCGCCGGCTAACTACGTGCCAGCAGCCGCGTAATACGTAGG  
GCGCAAGCGTTGTCCGGAATTATTGGGCGTAAAGAGCTCGTAGGCGGCTTGTCCGCTCGGATGTGAAAGCCCGGGGCTTA  
ACCCGGGTCTGCATTGATACGGGCAGGCTAGAGTTCCGTTAGGGGAGATCGGAATTCCTGGTGTAGCGGTGAAATGCGC  
AGATATCAGGAGGAACACCGGTGGCGAAGGCGGATCTCTGGGCCGATACTGACGCTGAGGAGCGAAAGCGTGGGGAGCG  
AACAGGATTAGATACCTGGTAGTCCACGCCGTAACGTTGGGAACTAGGTGTGGGGCAGATTCCACGTCTCGTCCGTGCCG

CAGCTAACGCATTAAGTTCCCCGCCTGGGGAGTACGGCCGCAAGGCTAAAACCTCAAAGGAATTGACGGGGGCCCGCACAA  
GCAGCGGAGCATGTGGCTTAATTCGACGCAACGCGAAGAACCTTACCAAGGCTTGACATACACCGAAAACGGCCAGAGAT  
GGTCGCCCCCTGTGGTCCGGTGTACAGGTGGTGCATGGCTGTCTGTCAGCTCGTGTCTGTGAGATGTTGGGTAAAGTCCCGCA  
ACGAGCGCAACCCTTGTCTGTGTTGCCAGCATGCCCTTCGGGGTGATGGGGACTCACAGGAGACTGCCGGGTCAACTC  
GGAGGAAGGTGGGGACGACGTCAAGTCATCATGCCCTTATGTCTTGGGCTGCACACGTGCTACAATGGCCGGTACAATG  
AGCTGCGATACCGTGAGGTGGAGCGAATCTCAAAAAGCCGGTCTCAGTTCGGATTGGGGTCTGCAACTCGACCCCATGAA  
GTTGGAGTTGCTAGTAATCGCAGATCAGCATTGTGCGGTGAATACGTTCCCGGGCCTTGTACACACCGCCCGTACGTCA  
CGAAAGTCGGTAACACCGGAAGCCGGTGGCTCCAACCATGGTGGACACAGCGTCACGCTATAGAGTGCCCCCCT

262:

GCAAGGGGCAGCATAGCATGCAGTCGAGCGGTAGCACAGGGGAGCTTGCTCCCTGGGTGACGAGCGGCGACGGGTGAG  
TAATGTCTGGGAAACTGCCTGATGGAGGGGATAACTACTGGAACGGTAGCTAATACCGCATAACGTCGCAAGACCAAA  
GAGGGGACCTTCGGGCCTCTTGCCATCAGATGTGCCAGATGGGATTAGCTAGTAGGTGGGTAATGGCTCACCTAGGC  
GACGATCCCTAGCTGGTCTGAGAGGATGACCAGCCACACTGGAAGTGAAGACCGGTCCAGACTCCTACGGGAGGCAGCAG  
TGGGGAATATTGCACAATGGGCGCAAGCCTGATGCAGCCATGCCGCGTGTGTGAAGAAGGCCTTCGGGTTGTAAAGCACT  
TTCAGCGAGGAGGAAGGTGGTGAAGCTTAATACGCTCATCAATTGACGTTACTCGCAGAAGAAGCACCGGCTAACTCCGTG  
CCAGCAGCCGCGTAATACGGAGGGTGAAGCGTTAATCGGAATTACTGGGCGTAAAGCGCACGCAGGCGGTTTGTAAAG  
TCAGATGTGAAATCCCCGGGCTCAACCTGGGAACTGCATTTGAAACTGGCAAGCTAGAGTCTCGTAGAGGGGGGTAGAAT  
TCCAGGTGTAGCGGTGAAATGCGTAGAGATCTGGAGGAATACCGGTGGCGAAGGCGGCCCCCTGGACGAAGACTGACGCT  
CAGGTGCGAAAGCGTGGGGAGCAAACAGGATTAGATACCCTGGTAGTCCACGCTGTAAACGATGTCGATTTGGAGGTTGT  
GCCCTTGAGGCGTGGCTTCCGGAGCTAACCGGTTAAATCGACCGCCTGGGGAGTACGGCCGCAAGGTTAAAACCTCAAATG  
AATTGACGGGGGCCCGCACAAAGCGGTGGAGCATGTGGTTTAAATTCGATGCAACGCGAAGAACCTTACCTACTCTTGACAT  
CCAGAGAACTTTCCAGAGATGGATTGGTGCCTTCGGGAACTCTGAGACAGGTGCTGCATGGCTGTCTGTCAGCTCGTGTGT  
GAAATGTTGGGTTAAGTCCCGCAACGAGCGCAACCCTTATCCTTTGTTGCCAGCGGTTCCGGCCGGAACCTCAAAGGAGACT  
GCCAGTGATAAACTGGAGGAAGGTGGGGATGACGTCAAGTCATCATGGCCCTTACGAGTAGGGCTACACACGTGCTACAA  
TGGCGTATACAAAAGAGAAGCGACCTCGCGAGAGCAAGCGGACCTCATAAAGTACGTCGTAGTCCGGATTGGAGTCTGCAA  
CTCGACTCCATGAAGTCGGAATCGCTAGTAATCGTAGATCAGAATGCTACGGTGAATACGTTCCCGGGCCTTGTACACACC  
GCCCGTCACACCATGGGAGTGGGTTGCAAAAAGAAGTAGGTAGCTTAACTTCGGGAGGGCGCTACCACTTTGATCCAGCC  
CG
